## High Incomplete Skeletal Muscle Fatty Acid Oxidation Explains Low Muscle Insulin Sensitivity in Poorly Controlled T2D

Timothy P. Gavin,<sup>1,2</sup> Jacob M. Ernst,<sup>3,4</sup> Hyo-Bum Kwak,<sup>5</sup> Sarah E. Caudill,<sup>3,4</sup> Melissa A. Reed,<sup>6</sup> Ron T. Garner,<sup>1,2</sup> Yaohui Nie,<sup>1,2,7</sup> Jessica A. Weiss,<sup>1,2</sup> Walter J. Pories,<sup>8,9</sup> Moahad Dar,<sup>9,10</sup> Chien-Te Lin,<sup>9,11</sup> Monica J. Hubal,<sup>12</sup> P. Darrell Neuffer,<sup>9,11</sup> Shihuan Kuang,<sup>7</sup> and G. Lynis Dohm<sup>9,11</sup>

<sup>1</sup>Department of Health and Kinesiology, Purdue University, West Lafayette, Indiana 47907; <sup>2</sup>Max E. Wastl Human Performance Laboratory; Purdue University, West Lafayette, Indiana 47907; <sup>3</sup>Department of Kinesiology, East Carolina University, Greenville, North Carolina 27834; <sup>4</sup>Human Performance Laboratory, East Carolina University, Greenville, North Carolina 27834; <sup>5</sup>Department of Kinesiology, Inha University, Incheon 402-751, Korea; <sup>6</sup>Department of Kinesiology, West Chester University, West Chester, Pennsylvania 19382; <sup>7</sup>Department of Animal Sciences, Purdue University, West Lafayette, Indiana 47907; <sup>8</sup>Department of Surgery, East Carolina University, Greenville, North Carolina 27834; <sup>9</sup>East Carolina Diabetes and Obesity Institute, East Carolina University, Greenville, North Carolina 27834; <sup>10</sup>Department of Medicine, East Carolina University, Greenville, North Carolina 27834; <sup>11</sup>Department of Physiology, East Carolina University, Greenville, North Carolina 27834; and <sup>12</sup>Departments of Integrative Systems Biology and Exercise and Nutrition Sciences, George Washington University, Washington, DC 20052

**Context:** Almost 50% of type 2 diabetic (T2D) patients are poorly controlled [glycated hemoglobin (HbA1c)  $\geq$  7%]; however, the mechanisms responsible for progressively worsening glycemic control are poorly understood. Lower skeletal muscle mitochondrial respiratory capacity is associated with low insulin sensitivity and the development of T2D.

**Objective:** We investigated if skeletal muscle insulin sensitivity ( $S_i$ ) was different between well-controlled T2D (WCD) and poorly controlled T2D (PCD) and if the difference was associated with differences resulting from mitochondrial respiratory function.

**Design:** Vastus lateralis muscle mitochondrial respiration, mitochondrial content, mitochondrial enzyme activity, and fatty acid oxidation (FAO) were measured.  $S_i$  and the acute response to glucose (AIRg) were calculated by MINMOD analysis from glucose and insulin obtained during a modified, frequently sampled, intravenous glucose tolerance test.

**Results:**  $S_i$  and AIRg were lower in PCD than WCD. Muscle incomplete FAO was greater in PCD than WCD and greater incomplete FAO was associated with lower  $S_i$  and higher HbA1c. Hydroxyacyl-coenzyme A dehydrogenase expression and activity were greater in PCD than WCD. There was no difference in maximal mitochondrial respiration or content between WCD and PCD.

**Conclusion:** The current results suggest that greater skeletal muscle incomplete FAO in poorly controlled T2D is due to elevated  $\beta$  oxidation and is associated with worsening muscle  $S_i$ . (*J Clin Endocrinol Metab* 103: 882–889, 2018)

ISSN Print 0021-972X ISSN Online 1945-7197

Printed in USA

Copyright © 2018 Endocrine Society

Received 3 August 2017. Accepted 10 November 2017.

First Published Online 15 November 2017

Abbreviations: ADP, adenosine 5'-diphosphate; AIRg, acute response to glucose; ASM, acid-soluble metabolite; BMI, body mass index; CoA, coenzyme A; CS, citrate synthase; FAO, fatty acid oxidation; FCCP, trifluorocarbonyl cyanide phenylhydrazine; GEO, Gene Expression Omnibus; HADHA, hydroxyacyl-coenzyme A; HbA1c, glycated hemoglobin; HOMA- $\beta$ , homeostatic model assessment of  $\beta$ -cell function; HOMA-IR, homeostatic model assessment of insulin resistance; IVGTT, intravenous glucose tolerance test; MCD, malonyl CoA decarboxylate; *p*-ACC, phospho-acetyl-CoA carboxylase; PCD, poorly controlled T2D; PmFB, permeabilized muscle fiber; T2D, type 2 diabetic; TCA, tricarboxylic acid; Tris, tris(hydroxymethyl)aminomethane;  $S_i$ , insulin sensitivity; WCD, well-controlled T2D.

The incidence of type 2 diabetes mellitus (T2D) is increasing at an alarming rate and is associated with substantial financial burden to the health care system. In patients with diabetes, 46% of patients are poorly controlled [glycated hemoglobin (HbA1c)  $\geq 7\%$ ]. The costs associated with related treatments are greater in poorly controlled patients with diabetes, and an elevated HbA1c increases the risk for diabetes comorbidities (1). Even with aggressive pharmacological treatment, fasting blood glucose and glycemic control rise over time, documenting the progressive effect of T2D duration on glycemic control (2). Skeletal muscle insulin resistance is a hallmark decrement in T2D (3, 4). We have recently shown that higher HbA1c is associated with increased duration of diabetes and low skeletal muscle insulin sensitivity ( $S_I$ ) and  $\beta$ -cell function, confirming a deterioration of glycemic control with progression of the disease (5).

There is a stepwise reduction in skeletal muscle  $S_I$  from lean to obese to obese type 2 patients with diabetes, with further declines with longer duration of T2D (5). Several potential mechanisms have been proposed for the low overall skeletal muscle  $S_I$  in T2D including lower GLUT4 content (6), impaired insulin signaling (7), greater inflammation (8), reduced glycogen synthesis capacity (9), and altered mitochondrial function due to nutrient overload [increased fatty acid oxidation [FAO; (10) and greater reactive oxygen species production (11)]. Lipid overload leads to increased incomplete fatty acid  $\beta$  oxidation in muscle (10), and increased acylcarnitines have been directly implicated in the development of muscle insulin resistance (12).

However, little is known about the progressive reduction in skeletal muscle  $S_I$  associated with worsening glycemic control in T2D. In the current report, we investigated if skeletal muscle  $S_I$  was different between well (HbA1c  $< 7\%$ ) and poorly (HbA1c  $\geq 7\%$ ) controlled T2D and if the difference was associated with corresponding changes in mitochondrial respiratory function. We hypothesized that skeletal muscle  $S_I$  and mitochondrial function would be lower in poor vs well controlled T2D.

## Materials and Methods

Eight well-controlled (HbA1c  $< 7\%$ ; range, 5.3% to 6.6%) and eight poorly controlled (HbA1c  $\geq 7\%$ ; range, 7.0% to 9.9%) T2D patients volunteered to participate in the study after receiving written and verbal explanations of the content and intent of the study in accordance with the University & Medical Center Institutional Review Board. Patients in the current report represent a subset of patients from our previous report (5).

Patients were taken off oral glycemic control medications 3 days before testing. Long-acting insulin was stopped 24 hours before; short-acting insulin was stopped after the evening meal the night before undergoing an insulin-modified intravenous

glucose tolerance test (IVGTT). Patients on thiazolidinediones or a thyroid hormone replacement were excluded. Diabetic medication usage is shown in Supplemental Table 1. The progression of T2D was determined based on current treatment: 1, diet + exercise; 2, oral glycemic agents exclusively; 3, long-acting insulin; or 4, short-acting insulin.

## IVGTT

A frequently sampled insulin-modified IVGTT was performed in all subjects as described previously (5). Initial blood samples were drawn following an overnight fast. Following the fasting blood samples, glucose (50%) was injected into a catheter placed in an antecubital vein at a dose of 0.3 g/kg body mass. Insulin at a dose of 0.025 U/kg body mass was injected at minute 20 after glucose administration. Blood samples were obtained at minutes 2, 3, 4, 5, 6, 8, 10, 12, 14, 16, 19, 22, 25, 30, 40, 50, 60, 70, 80, 90, 100, 120, 140, 160, and 180. Samples were centrifuged, plasma transferred, and frozen at  $-80^\circ\text{C}$  until determination of glucose and insulin by previously described methodology (5).  $S_I$  index and  $\beta$ -cell function [acute insulin response to glucose (AIRg)] were assessed using minimal modeling analysis. Homeostatic model assessment of insulin resistance (HOMA-IR) and  $\beta$ -cell function (HOMA- $\beta$ ) were calculated from fasting insulin and glucose.

## Skeletal muscle biopsy

Before the IVGTT, a muscle biopsy was obtained from the vastus lateralis; portions were immediately processed for mitochondrial respiration and FAO. The remainder of the muscle sample was frozen in liquid  $\text{N}_2$  and stored at  $-80^\circ\text{C}$  for protein analysis by Western blotting and enzyme activity analysis.

## Mitochondrial respiration

Skeletal muscle mitochondrial respiration was determined using permeabilized muscle fibers (PmFBs) as previously described (13). After muscle removal, samples were placed in ice-cold buffer X (50 mM K-MES, 7.23 mM  $\text{K}_2\text{EGTA}$ , 2.77 mM  $\text{CaK}_2\text{EGTA}$ , 20 mM imidazole, 20 mM taurine, 5.7 mM adenosine triphosphate, 14.3 mM phosphocreatine, and 6.56 mM  $\text{MgCl}_2 \cdot 0.6\text{H}_2\text{O}$ ; pH 7.1). Two small muscle bundles (0.25 to 0.35 mg dry wt) were gently prepared from each sample along the longitudinal axis with a pair of needle-tipped forceps under magnification (MX6 Stereoscope, Leica Microsystems, Buffalo Grove, IL). Bundles were permeabilized in buffer X + 30  $\mu\text{g}/\text{mL}$  saponin and placed on a rotator at  $4^\circ\text{C}$  for 30 minutes. Following permeabilization, the PmFBs were washed in buffer Z (105 mM K-MES, 30 mM KCl, 0.5 mM EGTA, 10 mM  $\text{KH}_2\text{PO}_4$ , 5 mM  $\text{MgCl}_2/6\text{H}_2\text{O}$ , 0.5  $\text{mg}/\text{mL}^{-1}$  bovine serum albumin; pH 7.14) and placed on a rotator at  $4^\circ\text{C}$  for at least 15 minutes until analysis. At the conclusion of each experiment, PmFBs were washed in double-distilled  $\text{H}_2\text{O}$  to remove salts, freeze-dried (Labconco, Kansas, MO), and weighed.

$\text{O}_2$  consumption was measured at  $37^\circ\text{C}$  using a high-resolution Oxygraph-2K (OROBOROS Instruments, Innsbruck, Austria). Measurements were made in buffer Z containing 20 mM creatine and 25  $\mu\text{M}$  Blebbistatin to inhibit contraction. Two protocols were used (one on each fiber bundle): 1) 10 mM glutamate + 2 mM malate (complex I substrates), followed by the sequential additions of 4 mM adenosine 5'-diphosphate (ADP), 10 mM succinate (complex II substrate), 10  $\mu\text{M}$  cytochrome c

to test for mitochondrial membrane integrity, and 0.75  $\mu\text{M}$  trifluorocarbonylcyanide phenylhydrazine (FCCP) to measure uncoupled respiration; 2) 25  $\mu\text{M}$  palmitoyl-L-carnitine ( $\beta$ -oxidation) + 2 mM malate, followed by the sequential additions of 4 mM ADP, 10 mM glutamate, 10 mM succinate, 10  $\mu\text{M}$  cytochrome c, and 0.5  $\mu\text{M}$  FCCP.

## FAO

FAO was measured as described previously by Kim *et al.* (14). Briefly, 50 to 60 mg of muscle tissue was collected in 200  $\mu\text{L}$  of a buffer containing 250 mM sucrose, 1 mM EDTA, and 10 mM tris(hydroxymethyl)aminomethane (Tris) HCl, pH 7.4, and minced with scissors. Tissue was placed on ice and homogenized for 30 seconds with a nonstick pestle. Forty microliters of homogenate was added to the top well of a sealed, modified 48-well plate that contained a channel connecting to the adjacent trap well, which allowed for the passage of  $\text{CO}_2$  liberated by the complete oxidation of [ $1\text{-}^{14}\text{C}$ ]palmitate. The bottom trap well contained 1 N NaOH to collect the  $^{14}\text{CO}_2$  given off by the oxidation procedure. To initiate the reaction, 160  $\mu\text{L}$  of a reaction buffer composed of the following was added to the top wells: 0.2 mM palmitate ([ $1\text{-}^{14}\text{C}$ ]palmitate at 0.5  $\mu\text{Ci}/\text{mL}$ ), 100 mM sucrose, 10 mM Tris HCl, 5 mM  $\text{KH}_2\text{PO}_4$ , 80 mM KCl, 1 mM MgCl, 0.1 mM malate, 2 mM adenosine triphosphate, 1 mM DTT, 0.2 mM EDTA, 1 mM L-carnitine, 0.5 mM coenzyme A, and 0.5% fatty acid-free bovine serum albumin; pH 7.4. Samples were incubated in a 37°C water bath for 30 minutes, at which point 100  $\mu\text{L}$  of 70% perchloric acid was added to terminate the reaction. The plate was placed on a shaker for 1 hour to ensure complete transfer of  $\text{CO}_2$  into the bottom well. Label incorporation into  $^{14}\text{CO}_2$  was determined by scintillation counting using 4 mL of Uniscient BD (National Diagnostics, Atlanta, GA). Incomplete oxidative products [acid-soluble metabolites (ASMs)] remaining in the top well were measured as described by Bell *et al.* (15).

## Western blotting

Muscles were homogenized in lysis buffer (20 mM Tris HCl, pH 7.4; 5 mM EDTA, 10 mM sodium pyrophosphate, 100 mM NaF, 2 mM  $\text{Na}_3\text{VO}_4$ , 1% NP-40, 10  $\mu\text{g}/\text{mL}$  aprotinin, 10  $\mu\text{g}/\text{mL}$  leupeptin, 3 mM benzamide, 1 mM PMSF) and then diluted in 4X Laemmli + DTT. Proteins were fractionated on sodium dodecyl sulfate-polyacrylamide gels (Criterion precast gels; Bio-Rad, Hercules, CA); transferred to reduced-fluorescence polyvinylidene fluoride membrane (Immobilon-FL; Millipore, Bedford, MA), and incubated with one of the following primary antibodies: hydroxyacyl-coenzyme A [CoA dehydrogenase (HADHA, also known as  $\beta$ -HAD)], malonyl-CoA decarboxylase, and pyruvate dehydrogenase kinase 4 (PDK4), all from Abcam (Cambridge, MA); phospho-acetyl-CoA carboxylase ( $p$ -ACC) (Ser<sup>79</sup>) and pan-ACC from Millipore (Burlington, MA); and Total OXPHOS (complexes I through V) cocktail from Mitosciences (Eugene, OR). Either fluorescence-conjugated (LI-COR, Lincoln, NE) or horseradish peroxidase-conjugated (Santa Cruz, Dallas, TX) secondary antibodies were incubated with the membrane and detected using fluorescence (Odyssey, LI-COR) or chemiluminescence (PerkinElmer, Waltham, MA). Densitometric analysis was performed using either the Odyssey IR Imaging System (LI-COR) or Image Laboratory software (Bio-Rad). Results were normalized to  $\beta$ -actin or tubulin.

## Enzyme activity

The activity of  $\beta$ -HAD and citrate synthase (CS) were performed according to Jaworowski *et al.* (16) and Spinazzi *et al.* (17), respectively. Approximately 20 mg of frozen muscle was homogenized on ice in isolation buffer (20 mM Tris, 40 mM KCl, 2 mM EGTA, 50 mM sucrose, 0.2 mM  $\text{Na}_3\text{VO}_4$ , 50 mM NaF; pH 7.4). Total sample protein concentration was determined by the bicinchoninic acid method (BCA protein assay kit, Bio-Rad Laboratories). Samples were then frozen and kept at  $-80^\circ\text{C}$  until enzyme analysis.

## In silico analysis

To identify if in a larger cohort of T2D, a relationship existed between glycemic control and skeletal muscle  $\beta$ -oxidation, we performed *in silico* correlation with HbA1c and biological pathway analysis on the T2D patient subcohort ( $n = 45$ ) of the publicly available National Center for Biotechnology Information Gene Expression Omnibus (GEO) dataset GSE18732 (18). This dataset contains a profile of messenger RNA expression in the skeletal muscle of normal, glucose-intolerant, and T2D subjects. Our analysis was focused on the T2D subjects only. After downloading CEL files from GEO, CHP files were generated in Expression Console using the PLIER algorithm (Affymetrix); a Pearson product-moment correlation analysis was then performed. Probes with unadjusted  $P$  values  $< 0.01$  were carried into biological pathway analysis using Ingenuity Pathway Analysis (Qiagen; Germantown, MD). Ingenuity Pathway Analysis uses a highly curated Ingenuity knowledge base to assign annotations, functional biological data, and pathways to probe sets, based on peer-reviewed literature and third-party databases.

## Statistical treatment

Student  $t$  test was used to compare differences between groups. Linear regression and stepwise forward linear regression ( $P \leq 0.05$  to enter and to stay in the model) were performed to investigate relationships between variables. Significance was established at  $P \leq 0.05$  for all statistical sets, except *in silico* analysis, which used  $P < 0.01$ .

## Results

Subject characteristics for T2D patients grouped by well-controlled T2D (WCD) and poorly controlled T2D (PCD) glycemic control are in Table 1. There are several differences in PCD compared with WCD: longer duration of T2D and higher stage of T2D; greater fasting glucose, fasting insulin, and fasting triglycerides; and lower  $S_1$  and AIRg. Correlations among HbA1c,  $S_1$ , AIRg, HOMA-IR, and HOMA- $\beta$  appear in Table 2. HbA1c was correlated with  $S_1$  ( $r = -0.66$ ), consistent with skeletal muscle  $S_1$  being an important regulator of glycemic control. Forward stepwise linear regression between HbA1c and  $S_1$ , AIRg, HOMA-IR, and HOMA- $\beta$  revealed that  $S_1$  explained 42% of the variance in HbA1c and that the addition of AIRg, HOMA-IR, or HOMA- $\beta$  did not significantly improve the prediction of HbA1c. When the analysis was covaried for age and body mass index (BMI),  $S_1$  explained 34% of the variance in

**Table 1. Characteristics of T2D Patients Grouped by Glycemic Control (HbA1c < 7.0 mg/dL; HbA1c ≥ 7.0 mg/dL)**

|                                                                                        | HbA1c < 7.0<br>(n = 8) | HbA1c ≥ 7.0<br>(n = 8) |
|----------------------------------------------------------------------------------------|------------------------|------------------------|
| Age, y                                                                                 | 51.5 ± 3.1             | 59.4 ± 2.1             |
| Body mass, kg                                                                          | 98.7 ± 5.5             | 111.7 ± 7.2            |
| BMI, kg/m <sup>2</sup>                                                                 | 32.8 ± 1.7             | 37.2 ± 2.1             |
| Sex, M/F                                                                               | 5/3                    | 6/2                    |
| Race, C/AA                                                                             | 3/5                    | 6/2                    |
| Duration of T2D, y <sup>a</sup>                                                        | 4.1 ± 0.9              | 8.8 ± 1.7              |
| Age of T2D onset, y                                                                    | 47.4 ± 3.2             | 50.6 ± 2.9             |
| Stage*                                                                                 | 2.3 ± 0.2              | 3.3 ± 0.2              |
| Fasting glucose, mg/dL <sup>a</sup>                                                    | 113 ± 6                | 156 ± 15               |
| Fasting insulin, μU/mL <sup>a</sup>                                                    | 15.8 ± 2.0             | 28.2 ± 7.8             |
| HOMA-IR                                                                                | 4.4 ± 0.7              | 10.1 ± 2.9             |
| HOMA-β                                                                                 | 125.3 ± 21.1           | 189.0 ± 84.8           |
| Total cholesterol (mg/dL)                                                              | 171 ± 7                | 173 ± 11               |
| Triglycerides (mg/dL) <sup>a</sup>                                                     | 92 ± 8                 | 164 ± 27               |
| HDL (mg/dL)                                                                            | 46 ± 2                 | 41 ± 3                 |
| LDL (mg/dL)                                                                            | 106 ± 6                | 99 ± 11                |
| S <sub>I</sub> (min <sup>-1</sup> × μU <sup>-1</sup> × mL <sup>-1</sup> ) <sup>a</sup> | 2.1 ± 0.3              | 0.5 ± 0.2              |
| AIrG (μU × mL <sup>-1</sup> ) <sup>a</sup>                                             | 127.1 ± 46.0           | 5.0 ± 11.1             |
| HbA1c, %*                                                                              | 6.2 ± 0.1              | 8.4 ± 0.4              |

Abbreviations: AA, African American; C, Caucasian; F, female; HDL, high-density lipoprotein; LDL, low-density lipoprotein; M, male.

<sup>a</sup>P ≤ 0.05.

HbA1c with no other variable predicting a substantial amount of the remaining variance.

To investigate the role of skeletal muscle mitochondrial respiratory function on glycemic control in T2D, high-resolution respirometry in permeabilized fibers was performed using glutamate (Fig. 1A) and palmitoylcarnitine (Fig. 1B) as substrates. There were no differences between PCD and WCD, whether using either glutamate or palmitoylcarnitine as substrate. Also, there was no difference between groups when analyzed during state 3 or 4 respiration, with combined complex I and II (glutamate + succinate) substrates, or during uncoupled respiration. There was no difference in state 3 respiration with the addition of cytochrome C in either condition. Consistent with this, there was no difference in mitochondrial complexes I through V protein content between PCD and WCD (Fig. 1C). Thus, differences in glycemic control and S<sub>I</sub> between

**Table 2. Correlation Matrix on Glycemic Control**

|                | HbA1c              | S <sub>I</sub>     | AIrG  | HOMA-IR |
|----------------|--------------------|--------------------|-------|---------|
| S <sub>I</sub> | -0.66 <sup>a</sup> |                    |       |         |
| AIrG           | -0.46 <sup>b</sup> | 0.21               |       |         |
| HOMA-IR        | 0.48 <sup>b</sup>  | -0.51 <sup>a</sup> | -0.31 |         |
| HOMA-β         | 0.40               | -0.33              | 0.05  | 0.32    |

<sup>a</sup>P ≤ 0.05.

<sup>b</sup>P ≤ 0.10.

PCD and WCD cannot be accounted for by differences in maximal skeletal muscle mitochondria respiration or content.

Elevated skeletal muscle FAO has been proposed as a potential mechanism for impaired S<sub>I</sub> (10). To investigate if differences in skeletal muscle FAO existed between WCD and PCD, complete and incomplete FAO were measured. There was no difference in the complete oxidation of palmitate between groups, but incomplete oxidation products (ASMs) were greater in PCD compared with WCD (Fig. 2A). In addition, there were correlations between incomplete FAO and HbA1c and S<sub>I</sub> consistent with excessive skeletal muscle FAO contributing to impaired glycemic control and S<sub>I</sub> (Fig. 2B and Fig. 2D). Linear regression revealed that incomplete FAO (ASM) explained 40% of the variance in S<sub>I</sub> and 69% of the variance in HbA1c. When the analysis was covaried for age and BMI, incomplete FAO explained 34% of the variance in S<sub>I</sub> and 66% of the variance in HbA1c.

To investigate where the impairment in FAO might occur, protein content for PDK4, *p*-ACC/pan-ACC, malonyl CoA decarboxylate (MCD), and β-HAD were measured (Fig. 3). Although no differences were observed in PDK4, *p*-ACC/pan-ACC, and MCD, β-HAD protein was greater in PCD compared with WCD. Consistent with greater β-HAD protein, β-HAD activity was greater in PCD vs WCD. There was no difference in CS activity, and the β-HAD/CS activity ratio was greater in PCD, suggesting an elevation in β-oxidation relative to the citric acid [tricarboxylic acid (TCA)] cycle. In addition to greater β-HAD protein content, greater β-HAD activity could also be the result of posttranslational modification such as phosphorylation. Insulin phosphorylates several mitochondrial proteins in human skeletal muscle (19); whether allosteric or posttranslational modification of muscle β-HAD occurs with worsening T2D requires further study.

Gene array data analysis of the National Center for Biotechnology Information GEO dataset GSE18732 found significant correlations between HbA1c and 1114 skeletal muscle molecules with Pearson correlations at P < 0.01 (18). Of these, several FAO-related genes including *HADHA* (r = 0.50), *carnitine palmitoyltransferase 1A (CPT-1α)* (r = 0.49), and *CPT 1B (CPT-1β)* (r = 0.35) were correlated with HbA1c confirming our findings of an upregulation in muscle β-HAD with worsening glycemic control (Table 3). The top 10 canonical pathways in skeletal muscle of T2D patients associated with HbA1c are in Supplemental Table 2.

## Discussion

The principal findings from the current investigation are: (1) poorly controlled patients with T2D have elevated *in*

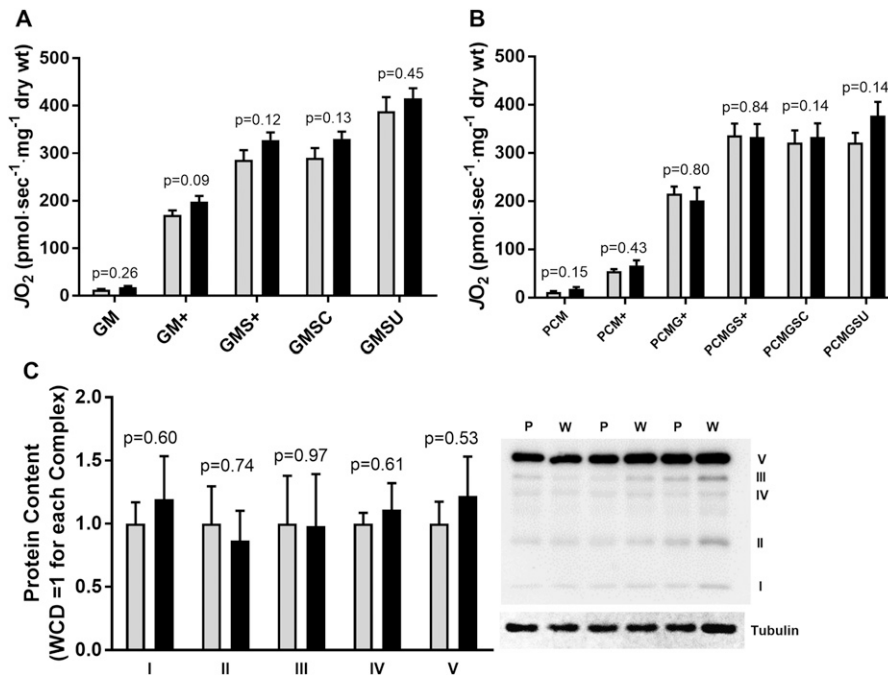

**Figure 1.** (A, B)  $JO_2$  and (C) mitochondrial complexes I through V in T2D patients grouped by glycemic control (HbA1c < 7.0 mg/dL; HbA1c  $\geq$  7.0 mg/dL).  $JO_2$ , skeletal muscle mitochondrial respiratory  $O_2$  flux ( $\text{pmol/s}^{-1}/\text{mg dry wt}^{-1}$ ). GM, 2 mM glutamate + 1 mM malate; GM+, GM + 2 mM ADP (state 3); GMS+, GM state 3 + 3 mM succinate; GMSU, GMS state 3 + 2  $\mu\text{M}$  FCCP; PCM, 25  $\mu\text{M}$  palmitoylcarnitine + 1 mM malate; PCM+, PCM + 2 mM ADP (state 3); PCMG+, PCMG state 3 + 2 mM glutamate; PCMGSC+, PCMG state 3 + 3 mM succinate; PCMGSC, PCMG state 3 + cytochrome C; PCMGSCU, PCMGSC state 3 + 2  $\mu\text{M}$  FCCP. Gray bars, HbA1c < 7.0 mg/dL (W); black bars, HbA1c  $\geq$  7.0 mg/dL (P).

*in vitro* skeletal muscle incomplete FAO compared with well controlled T2D; and (2) muscle incomplete FAO is inversely related to muscle  $S_1$  and glycemic control; whereas maximal mitochondrial respiratory capacity is not different between well and poorly controlled T2D. These findings provide evidence for a link between elevated skeletal muscle incomplete FAO and worsening insulin resistance and glycemic control in type 2 patients with diabetes.

### Skeletal muscle mitochondrial function

There are several reports documenting decrements in mitochondrial function between type 2 diabetic patients and nondiabetic controls (20–22). In the current report, we investigated mitochondrial function within T2D patients across glycemic control (WCD and PCD) with the goal of identifying mitochondrial changes associated with poor glycemic control. In addition, we used a multi-pronged approach in which mitochondrial respiration, mitochondrial content, FAO, and mitochondrial enzyme activities were measured. This comprehensive approach provided a broad perspective on detrimental changes in skeletal muscle that might occur in worsening T2D.

In contrast to reports of reduced mitochondrial respiration (23–25) and content (22, 26) in T2D compared with nondiabetic controls, we found no differences between WCD and PCD patients with diabetes. The lack of difference in respiration was across several different

states of respiration (non-ADP supported, ADP supported, uncoupled), substrate entry into complex I or complexes I + II (glutamate or glutamate + succinate), and macronutrient substrate (glutamate or palmitoylcarnitine). There also was no difference in mitochondrial content as measured by complexes I through V protein content. Previously, our group found that reductions in mitochondrial respiration and content are not required for the initial manifestation of insulin resistance (27). Thus, lower mitochondrial respiration and content that exist between T2D compared with non-T2D individuals (22–26) do not further contribute to the progressive worsening in  $S_1$  and glycemic control in T2D.

Skeletal muscle FAO is regulated at several steps. We investigated if elevated muscle FAO (measured *in vitro*) could be the result of alterations in PDK4, ACC, MCD, and  $\beta$ -HAD. Although there was no difference in PDK4, ACC, or MCD, there was greater  $\beta$ -HAD protein content and  $\beta$ -HAD activity in PCD vs WCD. Our data point to an elevation in  $\beta$ -oxidation unmatched by increases in the TCA cycle, which would result in an accumulation of acylcarnitines. Consistent with the current findings, high-fat feeding increases muscle incomplete FAO unmatched by compensatory increases in the TCA cycle in both humans and animals (10, 28).

It is recognized that the current study represents a small cohort of WCD and PCD patients. To address this, *in silico* analysis of the GEO dataset GSE18732 was

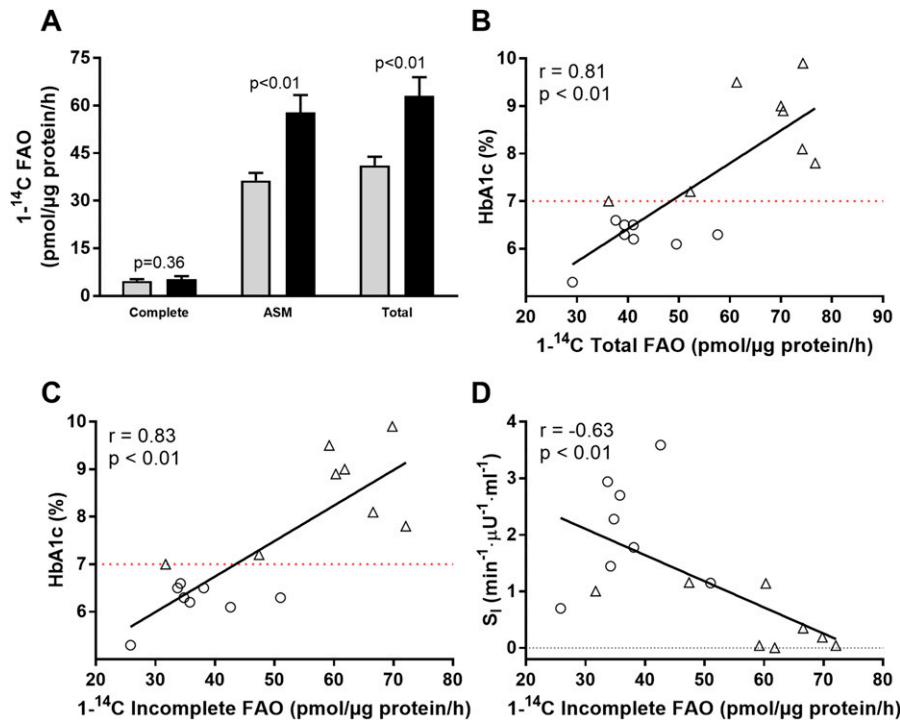

**Figure 2.** FAO in T2D grouped by glycemic control (HbA1c < 7.0 mg/dL; HbA1c  $\geq$  7.0 mg/dL). (A) FAO complete, complete oxidation of  $1\text{-}^{14}\text{C}$ -palmitate to  $^{14}\text{CO}_2$ ; total FAO, complete + incomplete FAO. (B–D) Relationships among HbA1c,  $S_1$ , and FAO.  $\circ$ , HbA1c < 7.0 mg/dL (gray bars);  $\Delta$ , HbA1c  $\geq$  7.0 mg/dL (black bars).

performed (18). The analysis revealed that elevated HbA1c was associated with skeletal muscle gene expression in T2D patients for: *acyl-CoA dehydrogenase, long chain*, members of the *long-chain fatty-acid-CoA ligase* family, *alcohol dehydrogenase 1C*, *CPT-1 $\alpha$*  and *CPT-1 $\beta$* , members of the cytochrome P450 family (*CYP19A1*, *CYP1B1*, *CYP3A7*, *CYP4B1*), *HADHA* (the gene that encodes  $\beta$ -HAD), and *solute carrier family 27 member 1*. Combined, these findings demonstrate a clear upregulation of skeletal muscle FAO with worsening muscle  $S_1$  and glycemic control and identify the potential for FAO inhibition as an effective treatment in poorly controlled T2D.

Koves *et al.* (10) found lipid overloading promoted skeletal muscle insulin resistance through the overproduction of acylcarnitines resulting from elevated incomplete FAO. Elevated plasma acylcarnitines have been observed in T2D (29), and incubation of skeletal muscle cells with acylcarnitines results in insulin resistance, possibly through increases in reactive oxygen species (12). It is also possible that elevated fatty acid–derived acetyl-coA could inhibit pyruvate dehydrogenase and contribute to poor glycemic control and insulin resistance in poorly controlled T2D patients via the Randle/glucose-fatty acid cycle (30). If the Randle cycle does explain limits in glucose oxidation in poorly controlled T2D, the current results suggest it is not through altered expression of PDK4, MCD, or ACC phosphorylation.

### Worsening glycemic control in T2D

In patients with diabetes, 46% of patients are poorly controlled (HbA1c  $\geq$  7.0%), documenting a critical need to better understand the underlying pathologies and develop better treatments for poor glycemic control (1). Linear regression identified a significant relationship between HbA1c and  $S_1$  (skeletal muscle) and trends with AIRg (pancreas) and HOMA-IR (liver). Because HOMA-IR is calculated from fasting glucose and insulin and because fasting glucose is predominantly regulated by the liver, HOMA-IR was used as an index of liver insulin resistance. Stepwise linear regression was then performed between HbA1c and AIRg,  $S_1$ , and HOMA-IR to identify the contribution of each to explain HbA1c. In the model,  $S_1$  explained 43% of the variance in HbA1c, whereas AIRg and HOMA-IR did not significantly improve the model. If AIRg and HOMA-IR are forced into the model, the addition in variance explained is a nonsignificant 11% (54% of total variance). The current findings are in agreement with the long-held belief that  $\beta$ -cell function deteriorates with worsening T2D (31) and that higher HbA1c is associated with impaired  $\beta$ -cell function (32). However, the current data support a greater role for poor skeletal muscle  $S_1$  in worsening T2D than for poor  $\beta$ -cell function.

In conclusion, the current findings suggest that excessive incomplete skeletal muscle FAO explains low  $S_1$  and poor glycemic control in T2D. Because of the

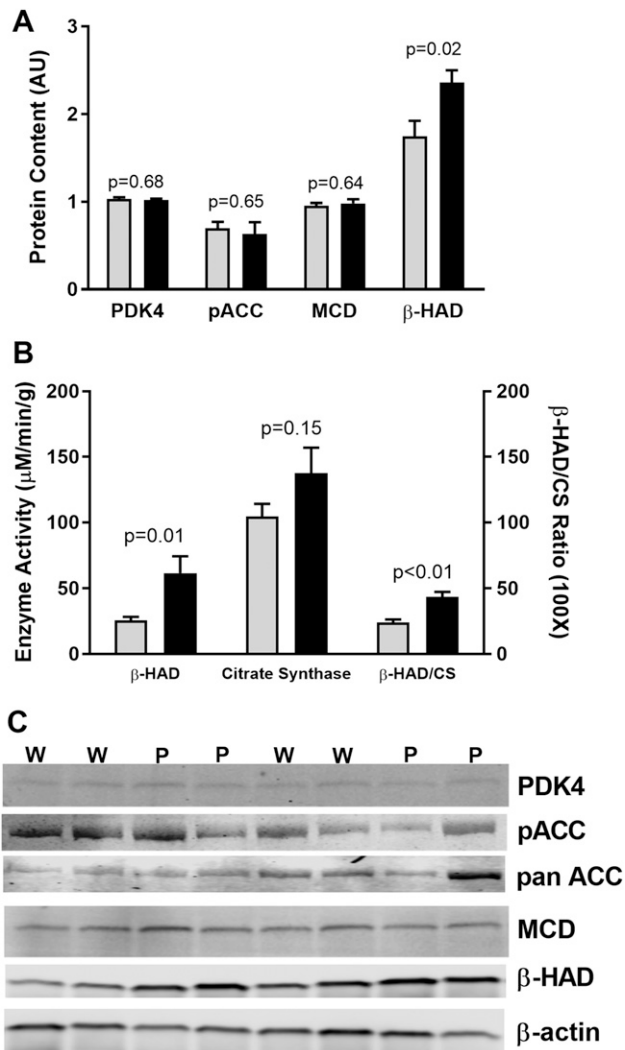

**Figure 3.** Regulation of FAO in T2D grouped by glycemic control (HbA1c < 7.0 mg/dL; HbA1c ≥ 7.0 mg/dL). (A) Protein content for regulators of FAO. (B) Enzyme activity for β-HAD and citrate synthase. Gray bars, HbA1c < 7.0 mg/dL (W); black bars, HbA1c ≥ 7.0 mg/dL (P).

association with longer duration of T2D, early interventions focused on improving skeletal muscle health ( $S_r$ , metabolism) should be a first-line treatment in recently diagnosed T2D patients to prevent the progressive worsening that occurs in T2D.

## Acknowledgments

The authors thank Angela Clark and Rita Bowden for their assistance and dedicate this work to our long-time colleague Ed Tapscott, whose support and friendship is missed every day.

**Financial Support:** This work was supported by an East Carolina Diabetes and Obesity Institute Pilot and Purdue University Research Initiative funds.

**Author Contributions:** T.P.G. designed the experiments, wrote the manuscript, and researched data. J.M.E., H.B.K., S.E.C., M.A.R., R.T.G., Y.N., J.A.W., and C.-T.L. researched

**Table 3. Correlations Between HbA1c and Skeletal Muscle FAO-Related Genes**

| Gene                                       | r Value <sup>a</sup> |
|--------------------------------------------|----------------------|
| ACADL: acyl-CoA dehydrogenase, long chain  | 0.50                 |
| ACSL3: long-chain-fatty-acid-CoA ligase 3  | 0.36                 |
| ACSL4: long-chain-fatty-acid-CoA ligase 4  | -0.37                |
| ADH1C: alcohol dehydrogenase 1C            | 0.52                 |
| CPT1A: carnitine palmitoyltransferase 1α   | 0.49                 |
| CPT1B: carnitine palmitoyltransferase 1β   | 0.35                 |
| CYP19A1                                    | 0.36                 |
| CYP11B1                                    | 0.50                 |
| CYP3A7                                     | -0.36                |
| CYP4B1 1                                   | 0.33                 |
| HADHA                                      | 0.50                 |
| SLC27A1: solute carrier family 27 member 1 | 0.32                 |

<sup>a</sup> $P \leq 0.01$ .

data. W.J.P. and G.L.D. designed the experiments, reviewed/edited the manuscript, and contributed to the discussion. M.D. and M.J.H. researched data, reviewed/edited the manuscript, and contributed to the discussion. S.K. and P.D.N. reviewed/edited the manuscript and contributed to the discussion.

**Correspondence and Reprint Requests:** Timothy P. Gavin, PhD, Department of Health and Kinesiology, 800 W. Stadium Avenue, Purdue University, West Lafayette, Indiana 47907. E-mail: [gavin1@purdue.edu](mailto:gavin1@purdue.edu).

**Disclosure Summary:** The authors have nothing to declare.

## References

1. Skyler JS, Bergenstal R, Bonow RO, Buse J, Deedwania P, Gale EA, Howard BV, Kirkman MS, Kosiborod M, Reaven P, Sherwin RS; American Diabetes Association/American College of Cardiology Foundation/American Heart Association. Intensive glycemic control and the prevention of cardiovascular events: implications of the ACCORD, ADVANCE, and VA diabetes trials: a position statement of the American Diabetes Association and a scientific statement of the American College of Cardiology Foundation and the American Heart Association [published correction appears in *Diabetes Care*. 2009;32(4):754]. *Diabetes Care*. 2009;32(1):187–192.
2. U.K. Prospective Diabetes Study Group. U.K. prospective diabetes study 16. Overview of 6 years' therapy of type II diabetes: a progressive disease [published correction appears in *Diabetes*. 1996;45(11):1655]. *Diabetes*. 1995;44(11):1249–1258.
3. DeFronzo RA, Jacot E, Jequier E, Maeder E, Wahren J, Felber JP. The effect of insulin on the disposal of intravenous glucose. Results from indirect calorimetry and hepatic and femoral venous catheterization. *Diabetes*. 1981;30(12):1000–1007.
4. Petersen KF, Shulman GI. Etiology of insulin resistance. *Am J Med*. 2006;119(5, suppl 1):S10–S16.
5. Gavin TP, Ernst JM, Caudill SE, Dohm GL, Pories WJ, Dar M, Reed MA. Insulin sensitivity is related to glycemic control in type 2 diabetes and diabetes remission after Roux-en Y gastric bypass. *Surgery*. 2014;155(6):1036–1043.
6. Dohm GL, Elton CW, Friedman JE, Pilch PF, Pories WJ, Atkinson SM, Jr, Caro JF. Decreased expression of glucose transporter in muscle from insulin-resistant patients. *Am J Physiol*. 1991;260(3 Pt 1):E459–E463.
7. Krook A, Roth RA, Jiang XJ, Zierath JR, Wallberg-Henriksson H. Insulin-stimulated Akt kinase activity is reduced in skeletal muscle from NIDDM subjects. *Diabetes*. 1998;47(8):1281–1286.

8. Perseghin G, Petersen K, Shulman GI. Cellular mechanism of insulin resistance: potential links with inflammation. *Int J Obes Relat Metab Disord*. 2003; 27(S3, suppl 3):S6–S11.
9. DeFronzo RA, Bonadonna RC, Ferrannini E. Pathogenesis of NIDDM. A balanced overview. *Diabetes Care*. 1992;15(3):318–368.
10. Koves TR, Ussher JR, Noland RC, Slentz D, Mosesdale M, Ilkayeva O, Bain J, Stevens R, Dyck JR, Newgard CB, Lopaschuk GD, Muoio DM. Mitochondrial overload and incomplete fatty acid oxidation contribute to skeletal muscle insulin resistance. *Cell Metab*. 2008;7(1):45–56.
11. Anderson EJ, Lustig ME, Boyle KE, Woodlief TL, Kane DA, Lin CT, Price JW III, Kang L, Rabinovitch PS, Szeto HH, Houmard JA, Cortright RN, Wasserman DH, Neuffer PD. Mitochondrial H<sub>2</sub>O<sub>2</sub> emission and cellular redox state link excess fat intake to insulin resistance in both rodents and humans. *J Clin Invest*. 2009;119(3):573–581.
12. Aguer C, McCoin CS, Knotts TA, Thrush AB, Ono-Moore K, McPherson R, Dent R, Hwang DH, Adams SH, Harper ME. Acylcarnitines: potential implications for skeletal muscle insulin resistance. *FASEB J*. 2015;29(1):336–345.
13. Perry CG, Kane DA, Lin CT, Kozy R, Cathey BL, Lark DS, Kane CL, Brophy PM, Gavin TP, Anderson EJ, Neuffer PD. Inhibiting myosin-ATPase reveals a dynamic range of mitochondrial respiratory control in skeletal muscle. *Biochem J*. 2011;437(2):215–222.
14. Kim JY, Hickner RC, Cortright RL, Dohm GL, Houmard JA. Lipid oxidation is reduced in obese human skeletal muscle. *Am J Physiol Endocrinol Metab*. 2000;279(5):E1039–E1044.
15. Bell JA, Reed MA, Consitt LA, Martin OJ, Haynie KR, Hulver MW, Muoio DM, Dohm GL. Lipid partitioning, incomplete fatty acid oxidation, and insulin signal transduction in primary human muscle cells: effects of severe obesity, fatty acid incubation, and fatty acid translocase/CD36 overexpression. *J Clin Endocrinol Metab*. 2010;95(7):3400–3410.
16. Jaworowski A, Porter MM, Holmbäck AM, Downham D, Lexell J. Enzyme activities in the tibialis anterior muscle of young moderately active men and women: relationship with body composition, muscle cross-sectional area and fibre type composition. *Acta Physiol Scand*. 2002;176(3):215–225.
17. Spinazzi M, Casarin A, Pertegato V, Salviati L, Angelini C. Assessment of mitochondrial respiratory chain enzymatic activities on tissues and cultured cells. *Nat Protoc*. 2012;7(6):1235–1246.
18. Gallagher IJ, Scheele C, Keller P, Nielsen AR, Remenyi J, Fischer CP, Roder K, Babraj J, Wahlestedt C, Hutvagner G, Pedersen BK, Timmons JA. Integration of microRNA changes in vivo identifies novel molecular features of muscle insulin resistance in type 2 diabetes. *Genome Med*. 2010;2(2):9.
19. Kruse R, Højlund K. Mitochondrial phosphoproteomics of mammalian tissues. *Mitochondrion*. 2017;33:45–57.
20. Antoun G, McMurray F, Thrush AB, Patten DA, Peixoto AC, Slack RS, McPherson R, Dent R, Harper ME. Impaired mitochondrial oxidative phosphorylation and supercomplex assembly in rectus abdominis muscle of diabetic obese individuals [published correction appears in *Diabetologia*. 2016;59(1):396–397]. *Diabetologia*. 2015;58(12):2861–2866.
21. Kelley DE, He J, Menshikova EV, Ritov VB. Dysfunction of mitochondria in human skeletal muscle in type 2 diabetes. *Diabetes*. 2002;51(10):2944–2950.
22. Ritov VB, Menshikova EV, Azuma K, Wood R, Toledo FG, Goodpaster BH, Ruderman NB, Kelley DE. Deficiency of electron transport chain in human skeletal muscle mitochondria in type 2 diabetes mellitus and obesity. *Am J Physiol Endocrinol Metab*. 2010;298(1):E49–E58.
23. Phielix E, Meex R, Moonen-Kornips E, Hesselink MK, Schrauwen P. Exercise training increases mitochondrial content and ex vivo mitochondrial function similarly in patients with type 2 diabetes and in control individuals. *Diabetologia*. 2010;53(8):1714–1721.
24. Phielix E, Schrauwen-Hinderling VB, Mensink M, Lenaers E, Meex R, Hoeks J, Kooi ME, Moonen-Kornips E, Sels JP, Hesselink MK, Schrauwen P. Lower intrinsic ADP-stimulated mitochondrial respiration underlies in vivo mitochondrial dysfunction in muscle of male type 2 diabetic patients. *Diabetes*. 2008;57(11):2943–2949.
25. Mogensen M, Sahlin K, Fernström M, Glinborg D, Vind BF, Beck-Nielsen H, Højlund K. Mitochondrial respiration is decreased in skeletal muscle of patients with type 2 diabetes. *Diabetes*. 2007;56(6):1592–1599.
26. Ritov VB, Menshikova EV, He J, Ferrell RE, Goodpaster BH, Kelley DE. Deficiency of subsarcolemmal mitochondria in obesity and type 2 diabetes. *Diabetes*. 2005;54(1):8–14.
27. Fisher-Wellman KH, Weber TM, Cathey BL, Brophy PM, Gilliam LA, Kane CL, Maples JM, Gavin TP, Houmard JA, Neuffer PD. Mitochondrial respiratory capacity and content are normal in young insulin-resistant obese humans. *Diabetes*. 2014;63(1):132–141.
28. Baker II PR, Boyle KE, Koves TR, Ilkayeva OR, Muoio DM, Houmard JA, Friedman JE. Metabolomic analysis reveals altered skeletal muscle amino acid and fatty acid handling in obese humans. *Obesity (Silver Spring)*. 2015;23(5):981–988.
29. Adams SH, Hoppel CL, Lok KH, Zhao L, Wong SW, Minkler PE, Hwang DH, Newman JW, Garvey WT. Plasma acylcarnitine profiles suggest incomplete long-chain fatty acid beta-oxidation and altered tricarboxylic acid cycle activity in type 2 diabetic African-American women. *J Nutr*. 2009;139(6):1073–1081.
30. Randle PJ, Garland PB, Hales CN, Newsholme EA. The glucose fatty-acid cycle. Its role in insulin sensitivity and the metabolic disturbances of diabetes mellitus. *Lancet*. 1963;1(7285):785–789.
31. Fonseca VA. Defining and characterizing the progression of type 2 diabetes. *Diabetes Care*. 2009;32(Suppl 2):S151–S156.
32. Ostgren CJ, Lindblad U, Ranstam J, Melander A, Råstam L; Skaraborg Hypertension and Diabetes Project. Glycaemic control, disease duration and beta-cell function in patients with type 2 diabetes in a Swedish community. Skaraborg Hypertension and Diabetes Project. *Diabet Med*. 2002;19(2):125–129.
